# Supplementary material for: Hypoxia aggravates ferroptosis in RPE cells by promoting the Fenton reaction
Source: PubMed Central journal article supplement (PMC9338085; doi:10.1038/s41419-022-05121-z), 2022-07-29
Supplement: 41419_2022_5121_MOESM1_ESM.pdf [file 41419_2022_5121_MOESM1_ESM.pdf]

# **Hypoxia aggravates ferroptosis in RPE cells by promoting the Fenton reaction**

Yoshiyuki Henning, Ursula Sarah Blind, Safa Larafa, Johann Matschke, Joachim Fandrey

Supplementary File 1

# Full length Western Blots (Figure 1)

HIF-1 $\alpha$

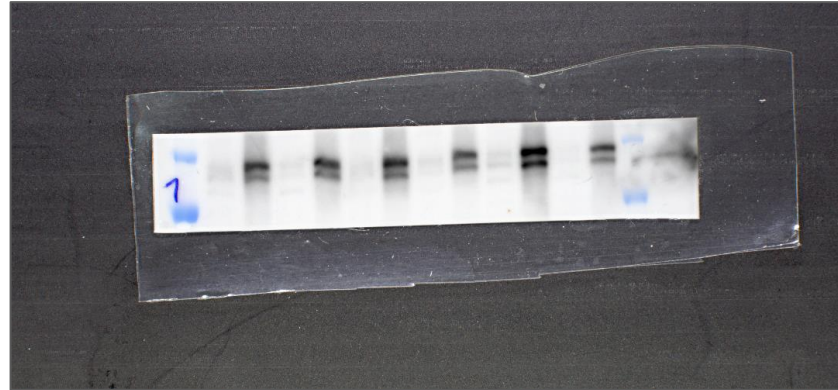

HIF-2 $\alpha$

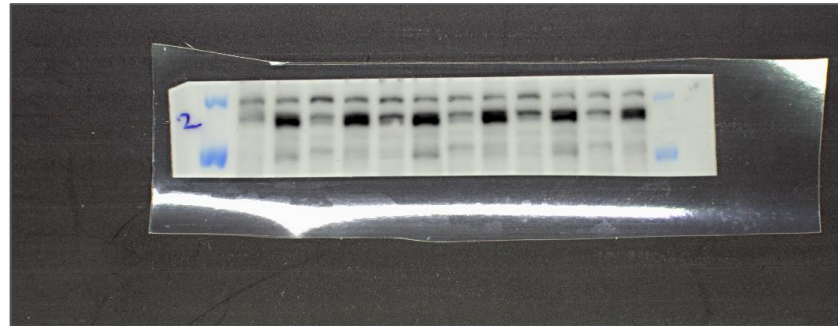

Tubulin

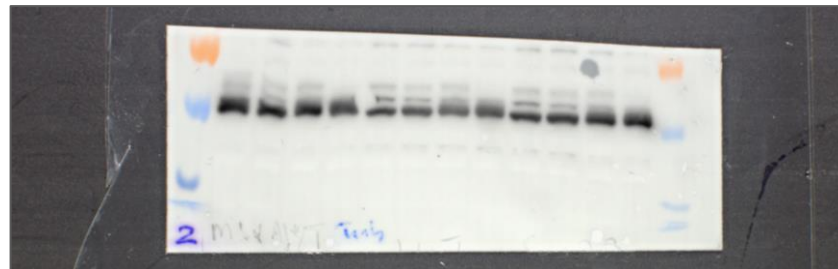

### Full length Western Blots (Figure 3)

SOD2

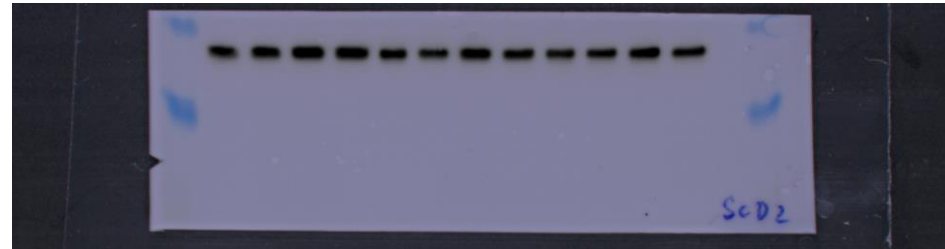

GPX1

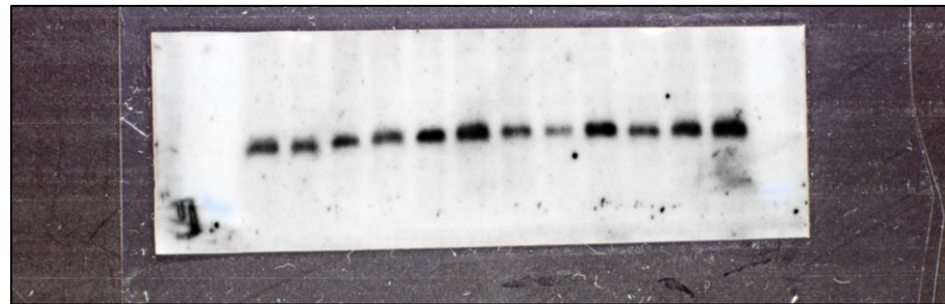

GPX4

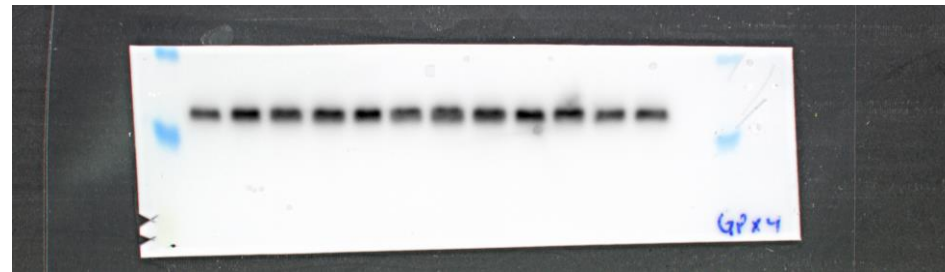

Tubulin

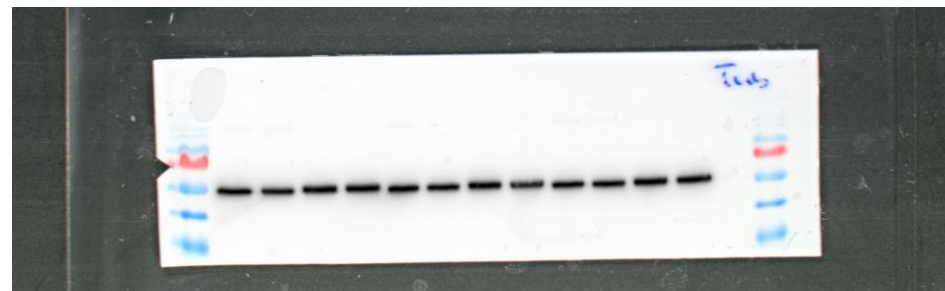

# Full length Western Blots (Figure 4)

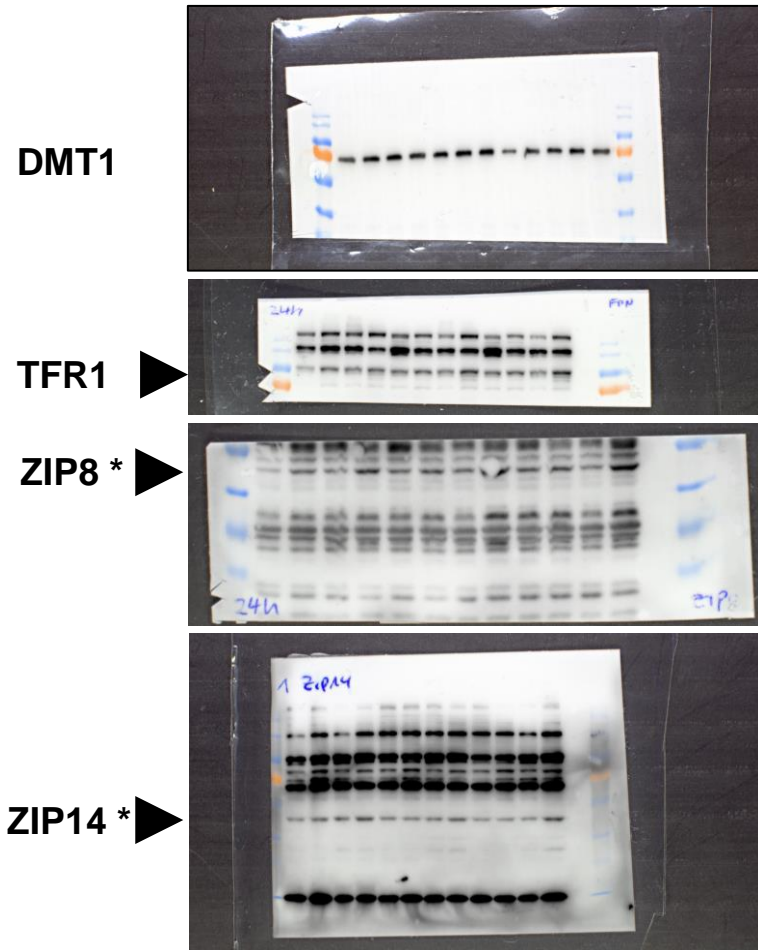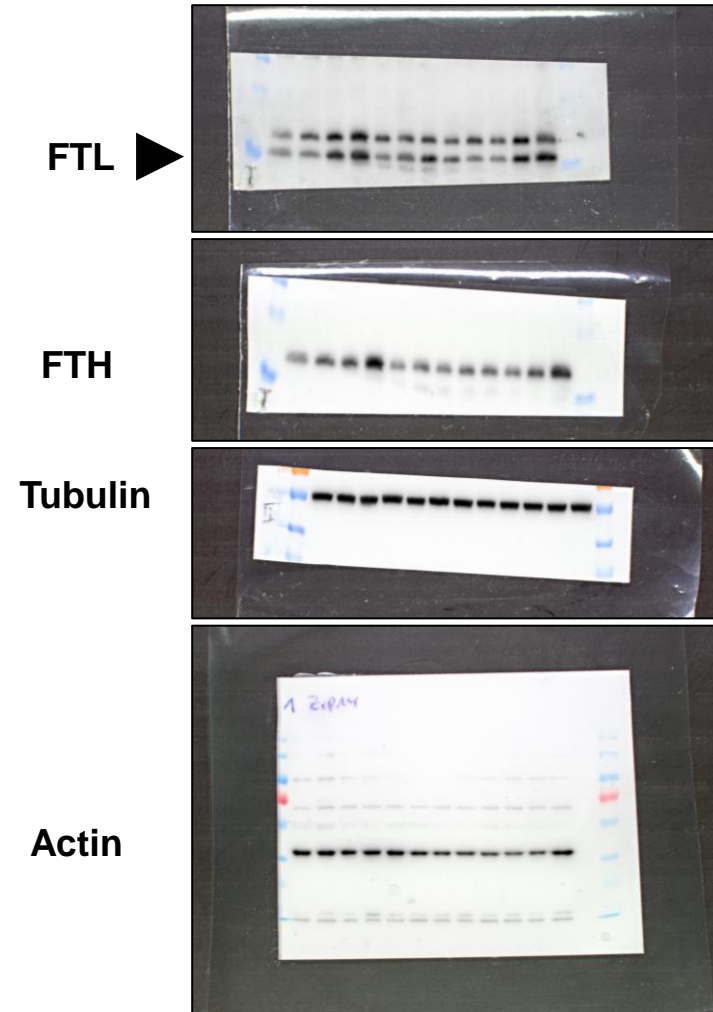

\* ZIP8 and ZIP14 contain potential N-linked glycosylation sites which may account for the presence of multiple molecular weights. All analyses were conducted based on the MW of the native protein.
